# Supplementary material
Source: PubMed Central journal article supplement (PMC1584269)

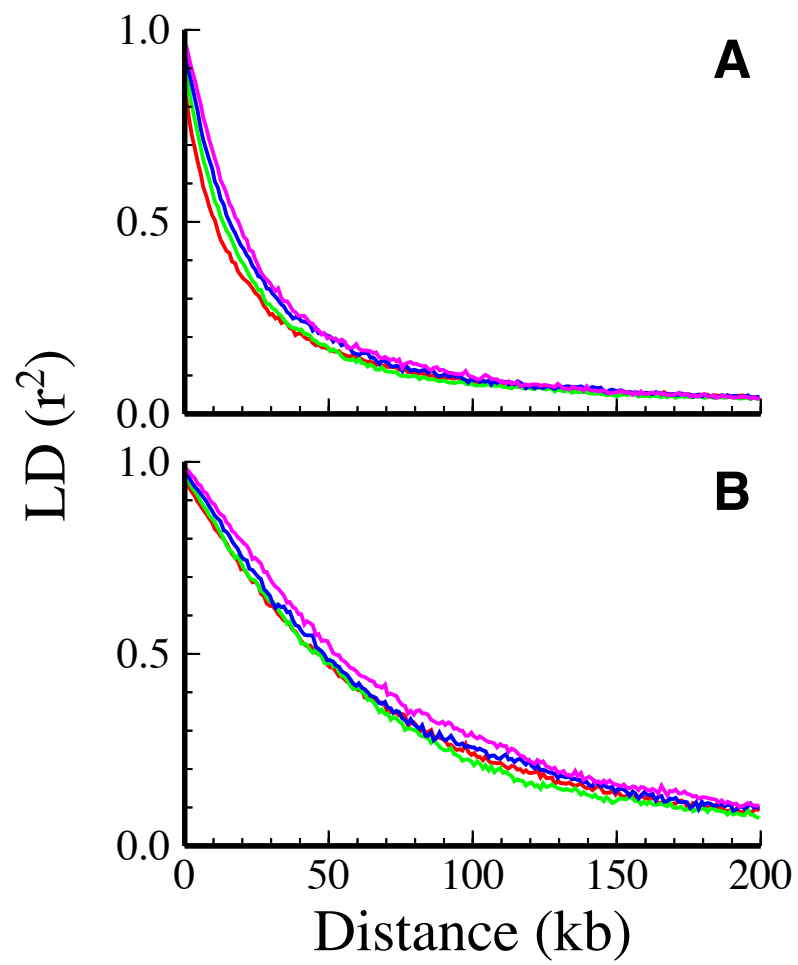

Supplement: pgen.0020142.sg001.pdf [file pgen.0020142.sg001.pdf]

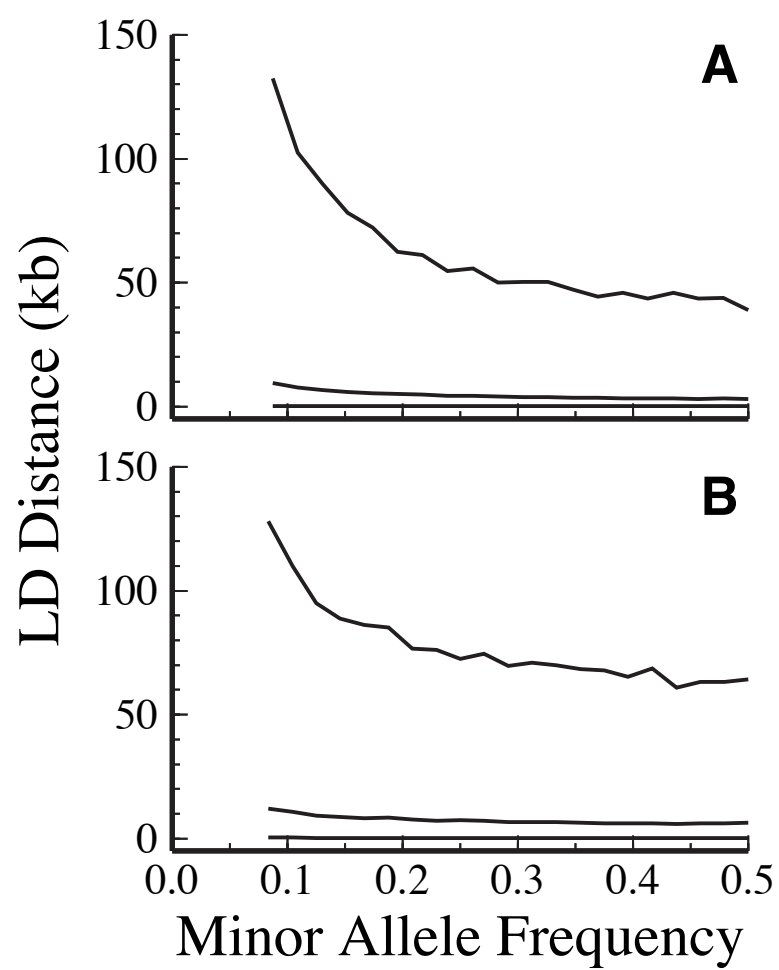

Supplement: pgen.0020142.sg002.pdf [file pgen.0020142.sg002.pdf]

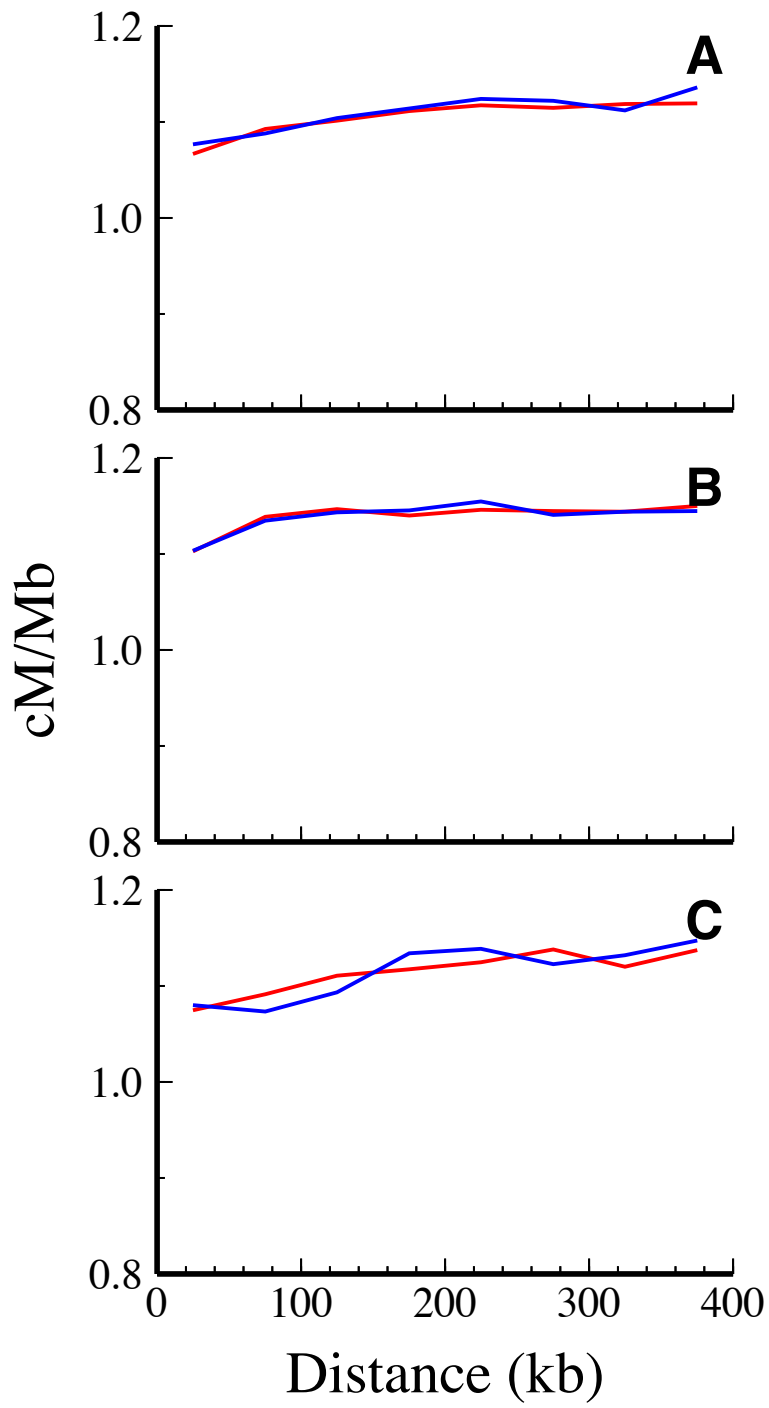

Supplement: pgen.0020142.sg003.pdf [file pgen.0020142.sg003.pdf]

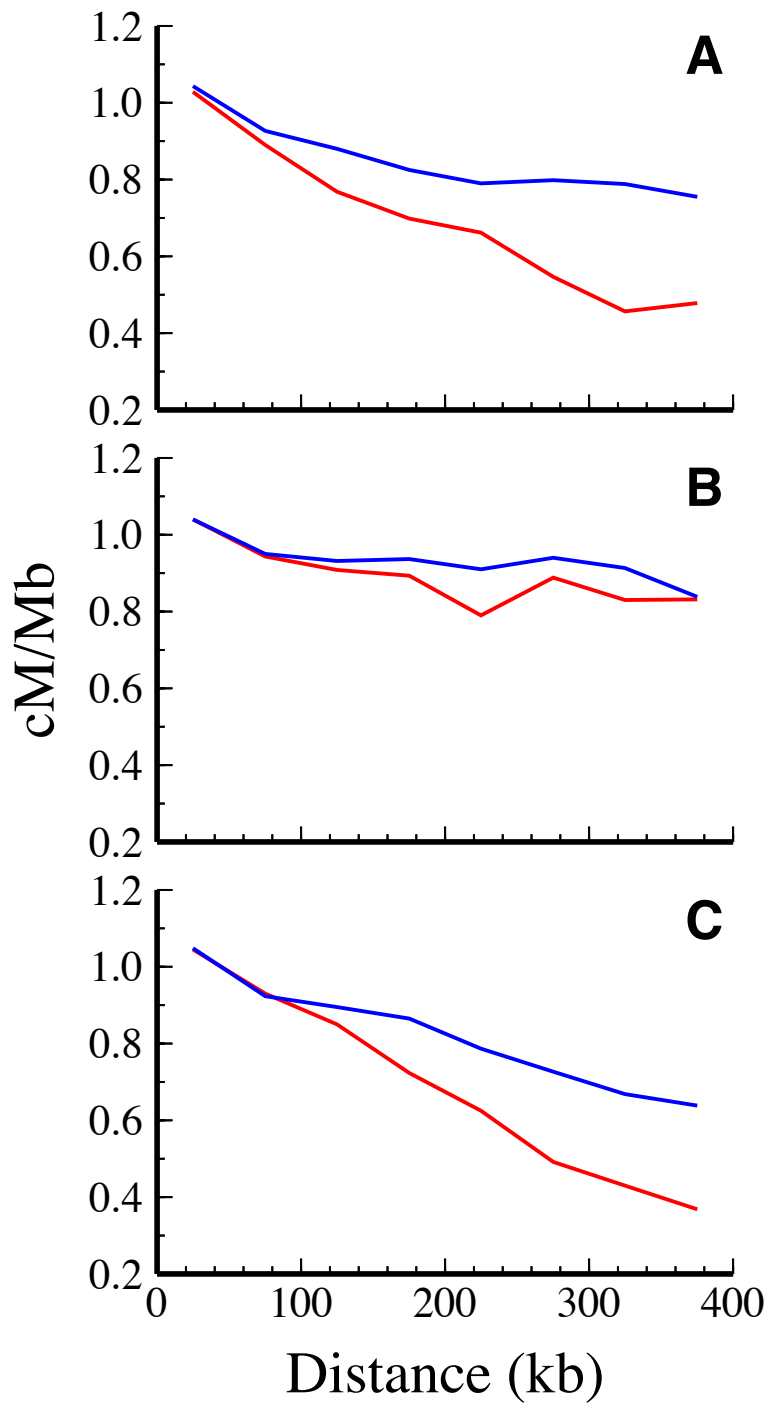

Supplement: pgen.0020142.sg004.pdf [file pgen.0020142.sg004.pdf]

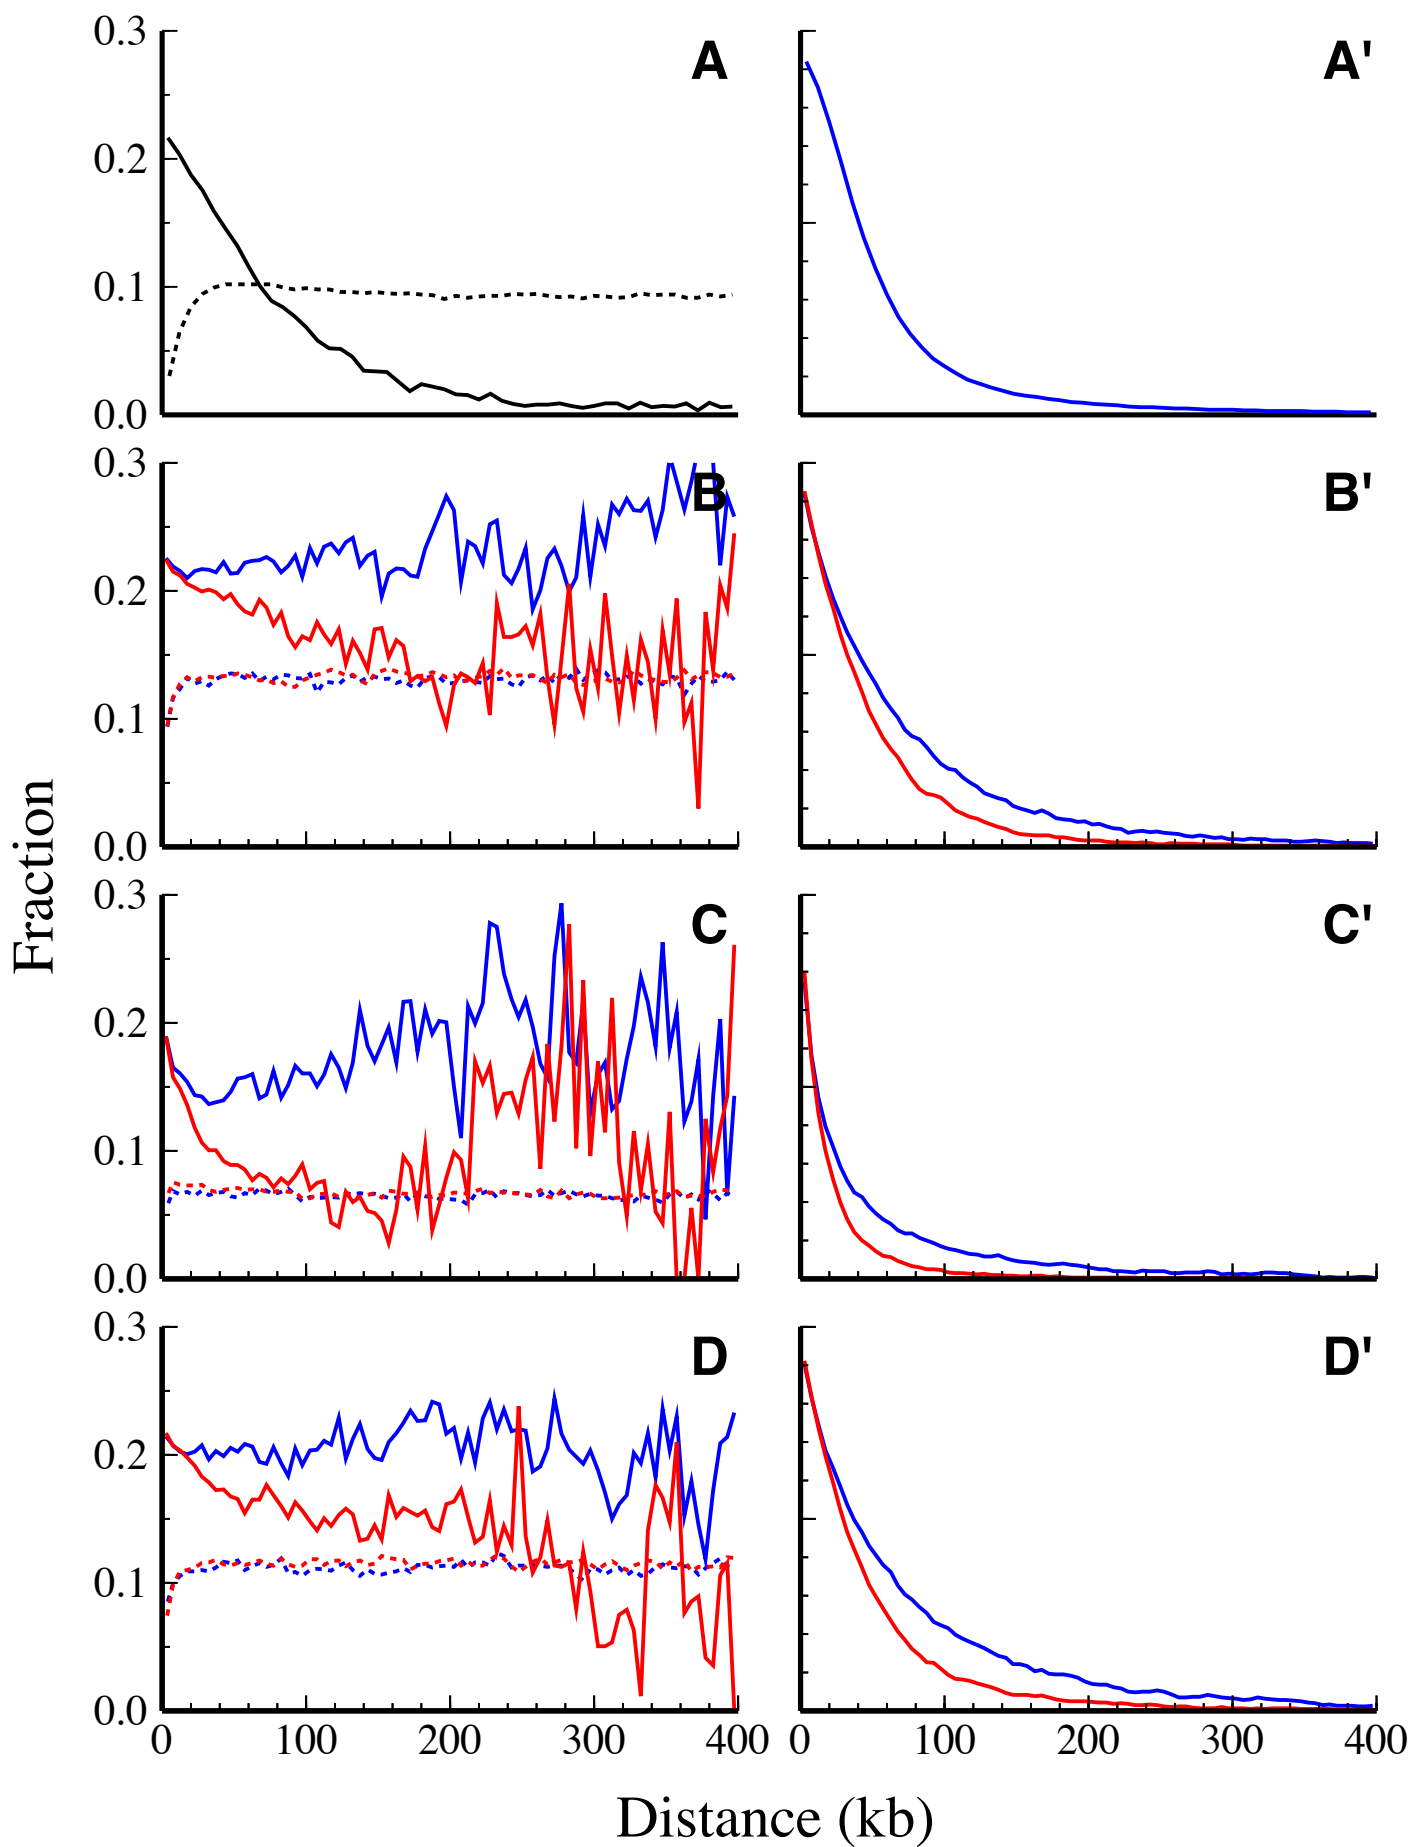

Supplement: pgen.0020142.sg005.pdf [file pgen.0020142.sg005.pdf]

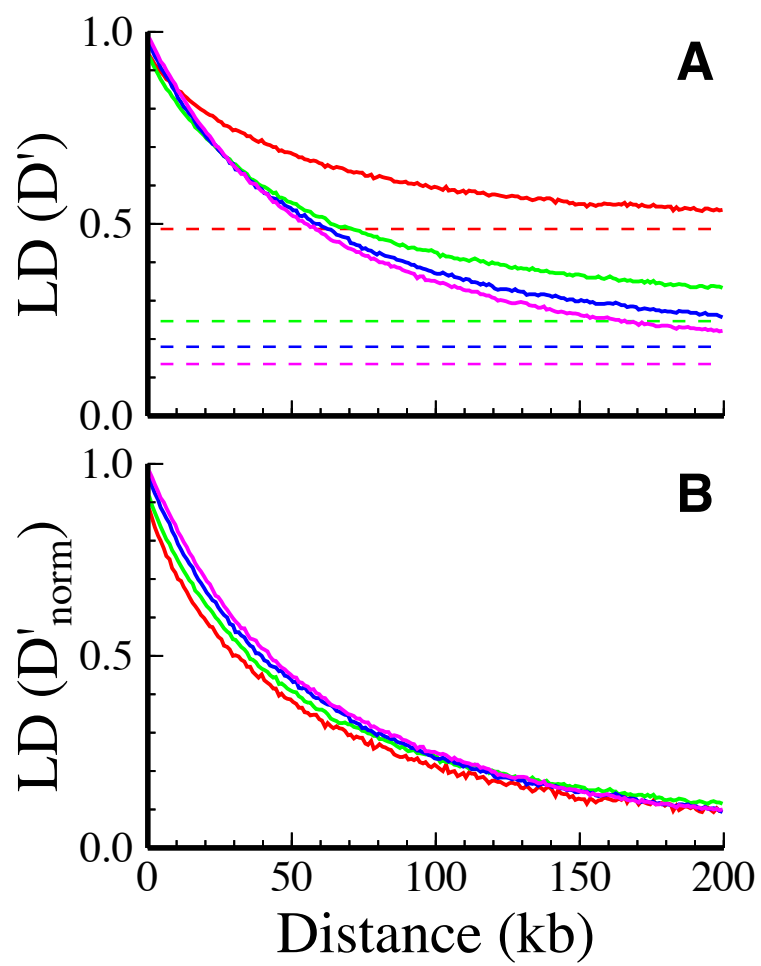

Supplement: pgen.0020142.sg006.pdf [file pgen.0020142.sg006.pdf]

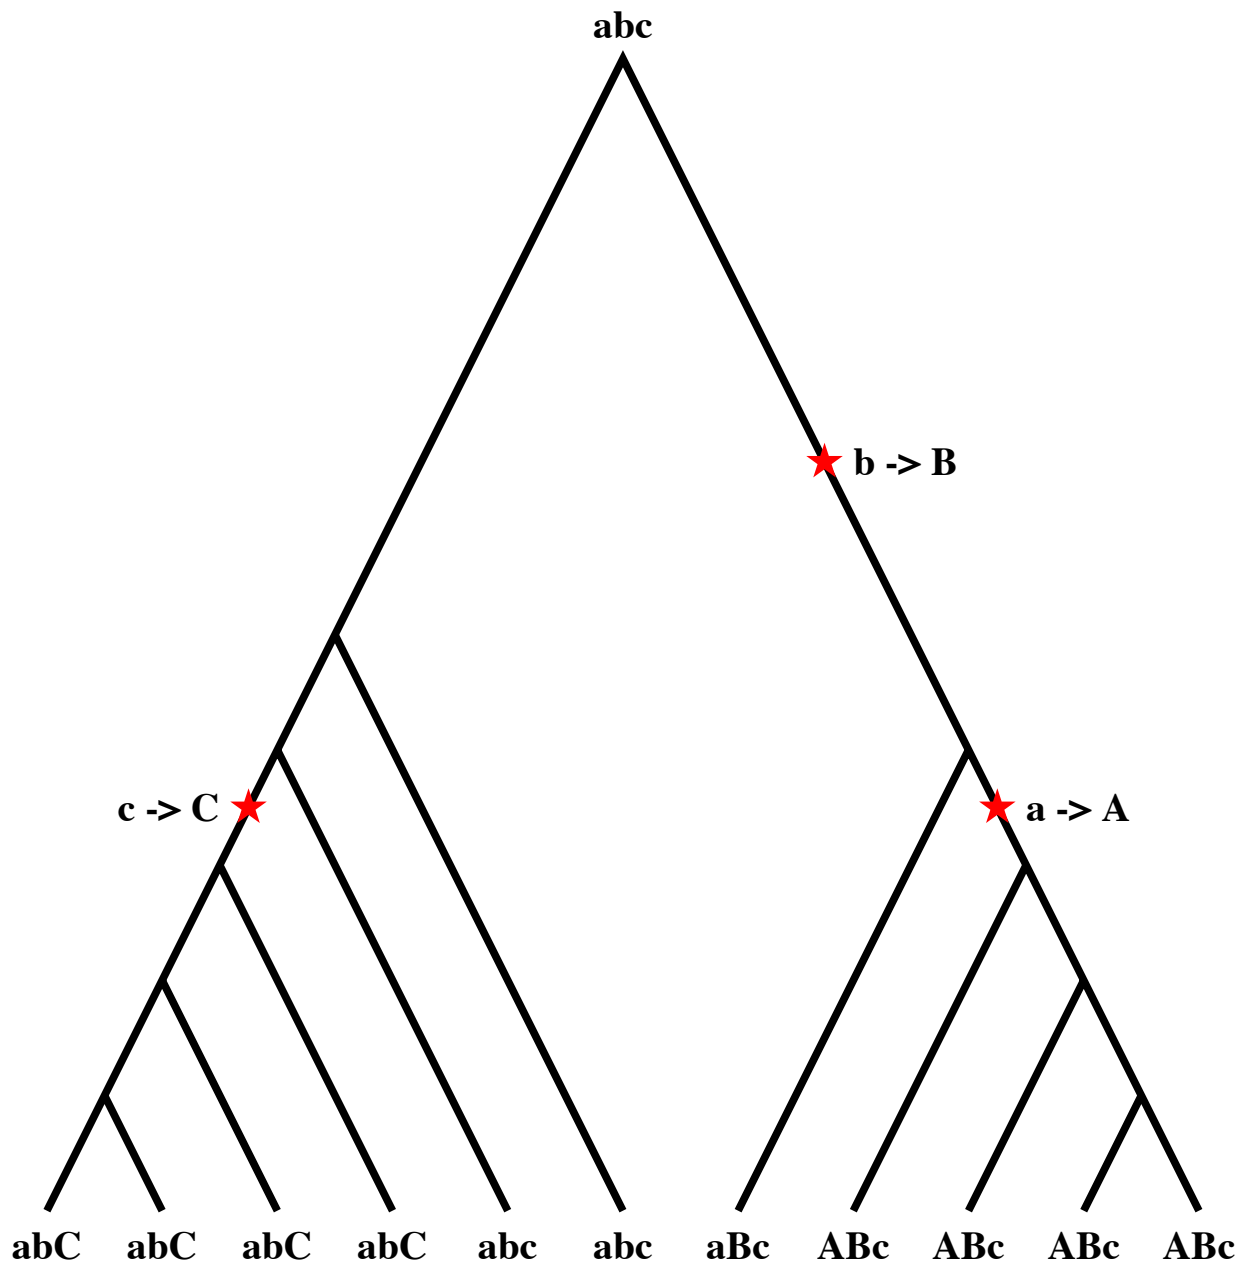

Supplement: pgen.0020142.sg007.pdf [file pgen.0020142.sg007.pdf]

**A**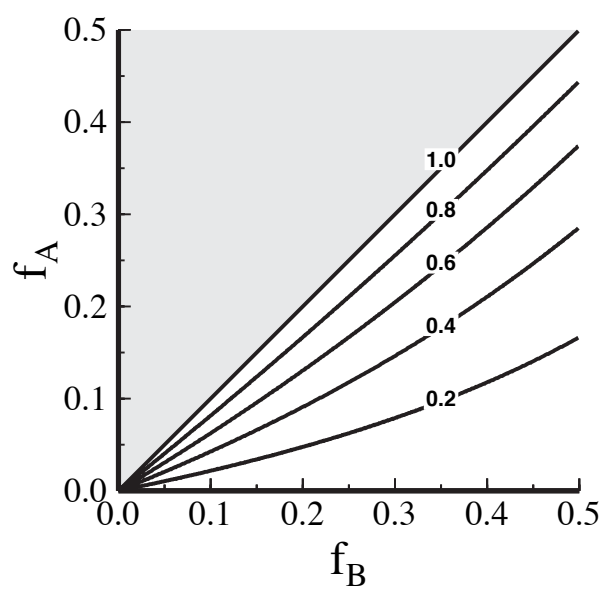**B**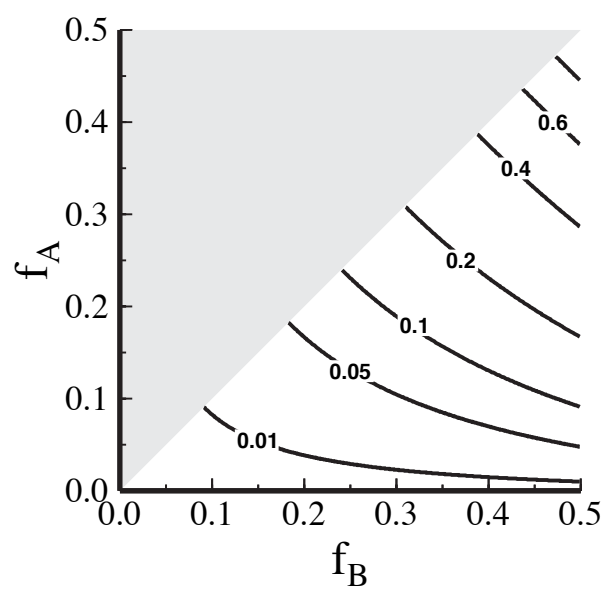**C**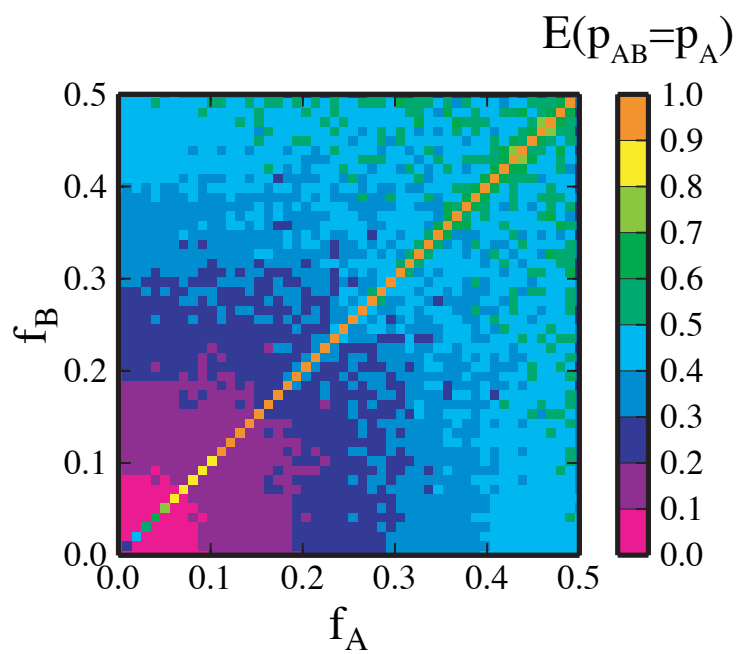**D**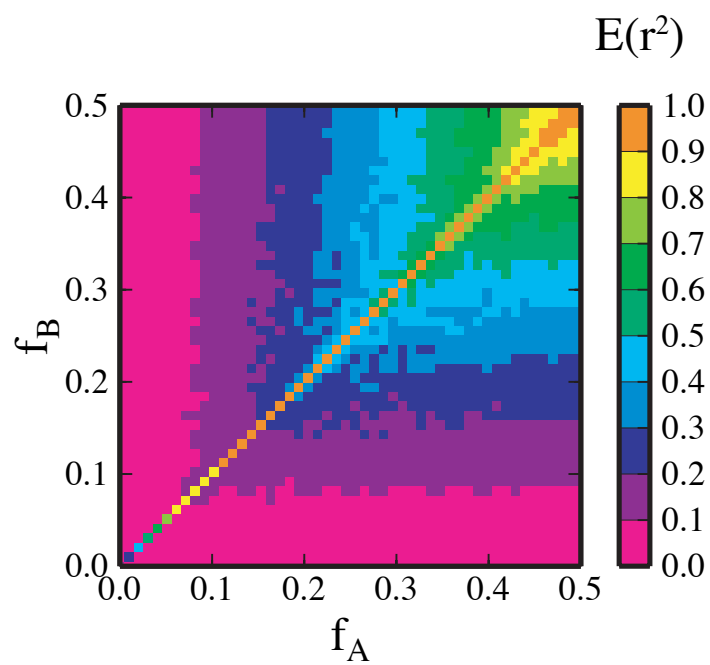

Supplement: pgen.0020142.sg008.pdf [file pgen.0020142.sg008.pdf]

**A**Percent ( $r^2$ )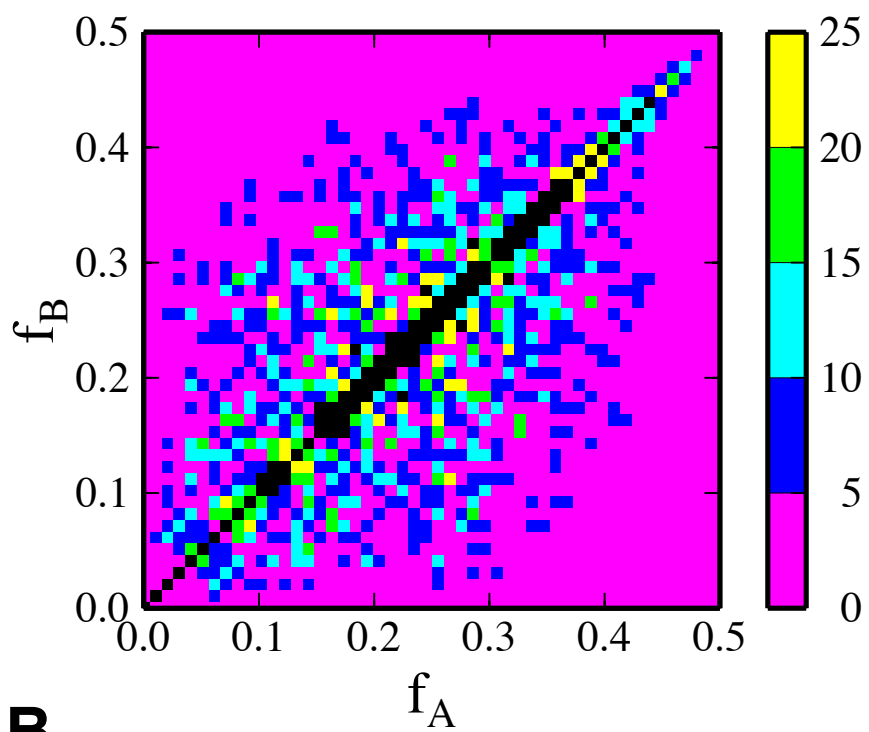**B** $r^2$ 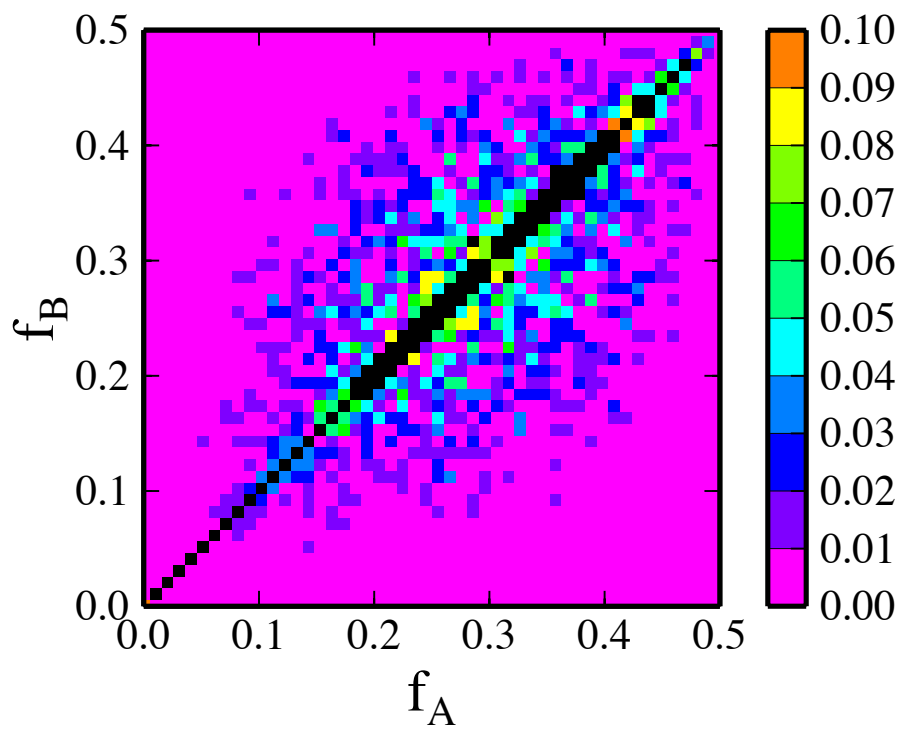

Supplement: pgen.0020142.sg009.pdf [file pgen.0020142.sg009.pdf]
